# Supplementary material
Source: PubMed Central journal article supplement (PMC6945797)
Supplement: Supp_Fig1.pdf [file Supp_Fig1.pdf]

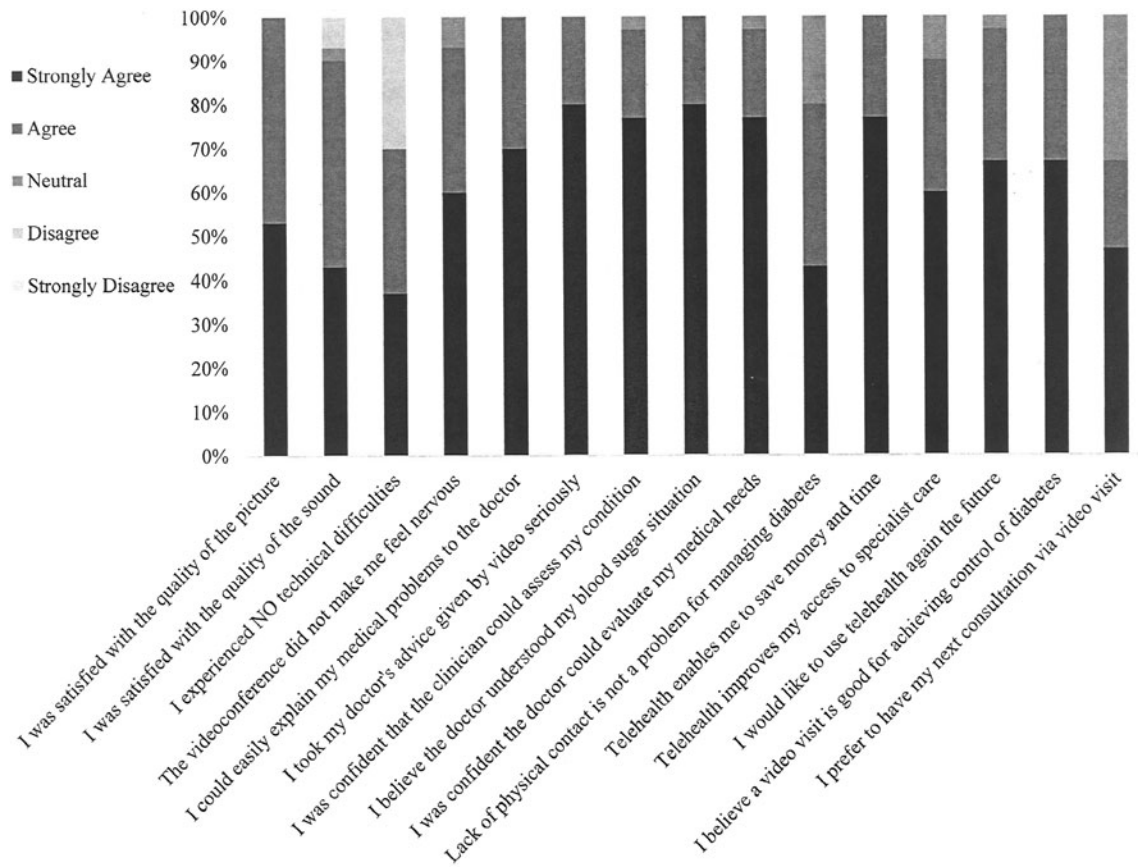

**SUPPLEMENTARY FIG. S1.** Responses ( $N=30$ ) to a validated diabetes telemedicine survey instrument from Fatehi et al.<sup>S1</sup>

**Supplementary Reference**

S1. Fatehi F, Martin-Khan M, Smith AC, et al.: Patient satisfaction with video teleconsultation in a virtual diabetes outreach clinic. *Diabetes Technol Ther* 2015;17:43–48.
