# Supplementary material
Source: PubMed Central journal article supplement (PMC6945797)
Supplement: Supp_Table1.pdf [file Supp_Table1.pdf]

## Supplementary Data

SUPPLEMENTARY TABLE S1. SURVEY RESPONSES  
AT STUDY COMPLETION (N=30)

|                                                                                |                       |
|--------------------------------------------------------------------------------|-----------------------|
| <b>What part of the study have you found most helpful?</b>                     | <i>N (%)</i>          |
| The program or app I use to share diabetes data                                | 3 (10%)               |
| The doctor's changes to my insulin doses                                       | 15 (50%)              |
| Other advice or encouragement from the doctor                                  | 4 (13%)               |
| Assistance with issues that arise between clinic visits                        | 8 (27%)               |
| None of the above                                                              | —                     |
| <b>Has the telemedicine study helped you with any of the following?</b>        | <i>N (%)</i>          |
| Improved monitoring of my blood glucose levels                                 | 28 (93%)              |
| Improvement in my A1c                                                          | 21 (70%)              |
| Improved access to diabetes technology                                         | 17 (57%)              |
| Fewer visits to the emergency department or hospital                           | 19 (63%)              |
| Improved access to my care team between clinic visits                          | 28 (93%)              |
| None of the above                                                              | —                     |
| <b>Overall, how satisfied are you with your experience using telemedicine?</b> | <i>N (%)</i>          |
| Very satisfied                                                                 | 29 (97%)              |
| Somewhat satisfied                                                             | 1 (3%)                |
| Somewhat dissatisfied                                                          | —                     |
| Very dissatisfied                                                              | —                     |
| <b>How many times did you need help from the team with technology?</b>         | <b>Median (range)</b> |
| The video program                                                              | 0 (0–3)               |
| Sharing diabetes device data from home                                         | 0 (0–5)               |
| <b>Please estimate the number of minutes it takes in your day for:</b>         | <b>Median (range)</b> |
| A visit to our clinic                                                          | 240 (120–2880)        |
| A telemedicine visit                                                           | 30 (15–60)            |
| Uploading diabetes device data from home                                       | 5 (1–60)              |
